# Supplementary material for: Reduction tuning of ultrathin carbon shell armor covering IrP2 for accelerated hydrogen evolution kinetics with Pt-like performance
Source: Royal Society of Chemistry journal article supplement (doi:10.1039/d0ta10379a), 2020-12-10
Supplement: d0ta10379a1.pdf [file d0ta10379a1.pdf]

## Supplementary Information

# Reduction tuning of ultrathin carbon shell armour covering IrP<sub>2</sub> for accelerated hydrogen evolution kinetics with Pt-like performance

Wen-Li Yu <sup>a</sup>, Jing-Qi Chi <sup>\*b</sup>, Bin Dong <sup>\*a</sup>

*a* College of Science, China University of Petroleum (East China), Qingdao 266580, PR China

*b* Key Laboratory of Eco-Chemical Engineering, Taishan Scholar Advantage and Characteristic  
Discipline Team of Eco Chemical Process and Technology, College of Chemical Engineering,  
Qingdao University of Science and Technology, Qingdao 266042, PR China

**\* Corresponding Authors.**

Email: [chijingqi@qust.edu.cn](mailto:chijingqi@qust.edu.cn) (J.Q. Chi), [dongbin@upc.edu.cn](mailto:dongbin@upc.edu.cn) (B. Dong)

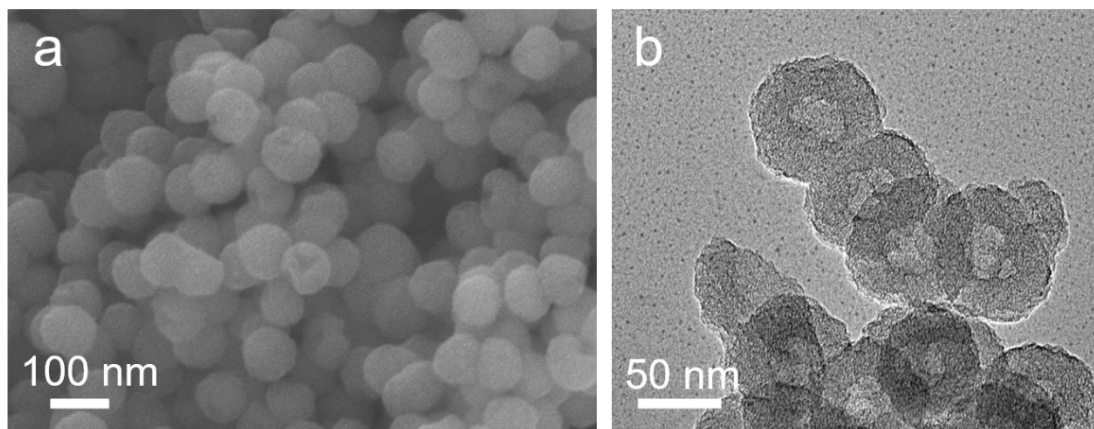

**Fig. S1** (a) SEM and (b) TEM image of NC.

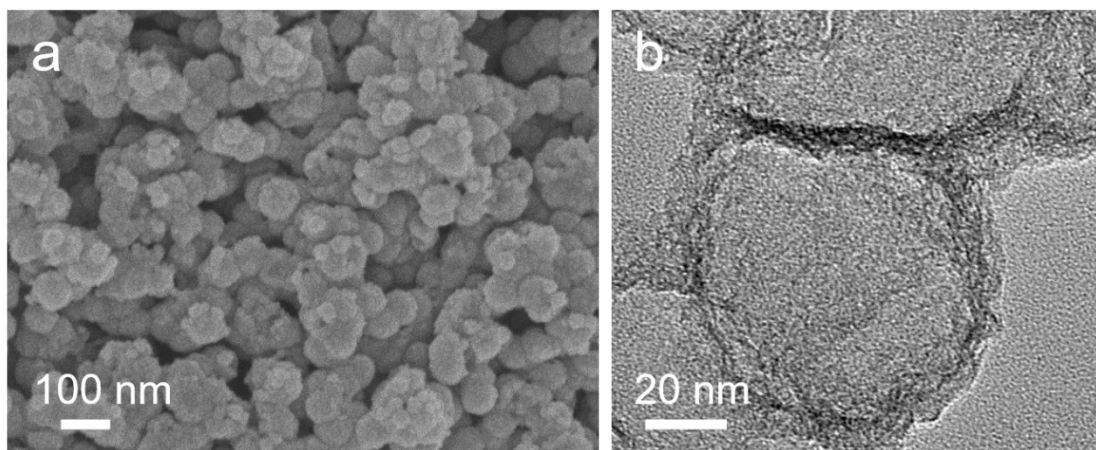

**Fig. S2** (a) SEM and (b) TEM image of NPC.

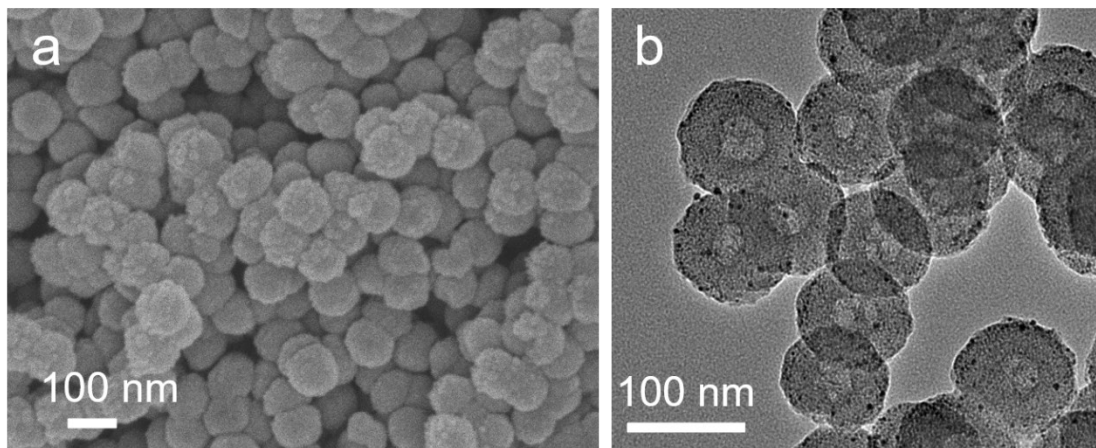

**Fig. S3** (a) SEM and (b) TEM image of Ir@NC.

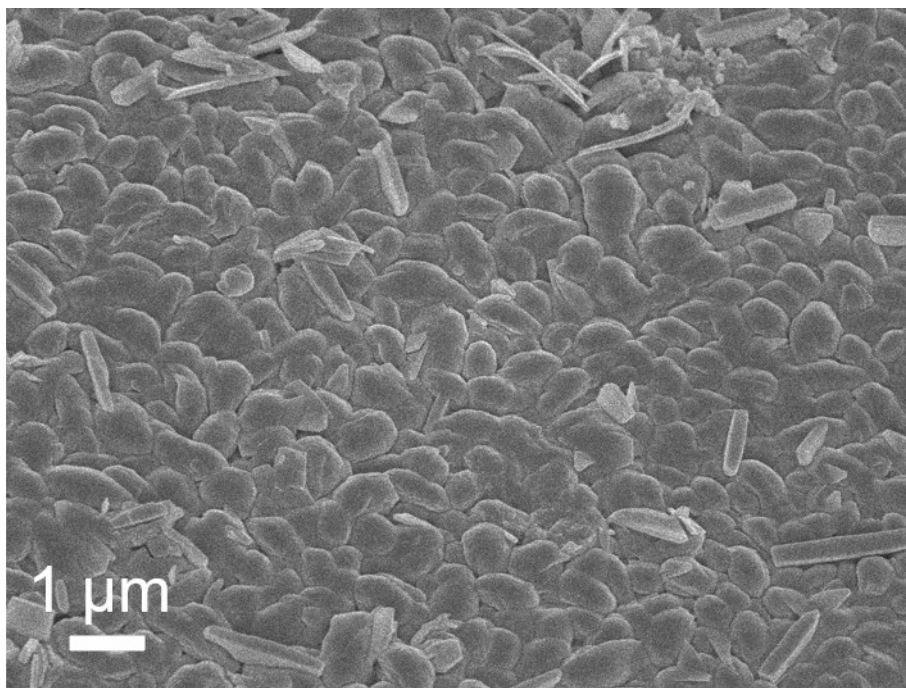

**Fig. S4** SEM image of IrP<sub>2</sub> NPs.

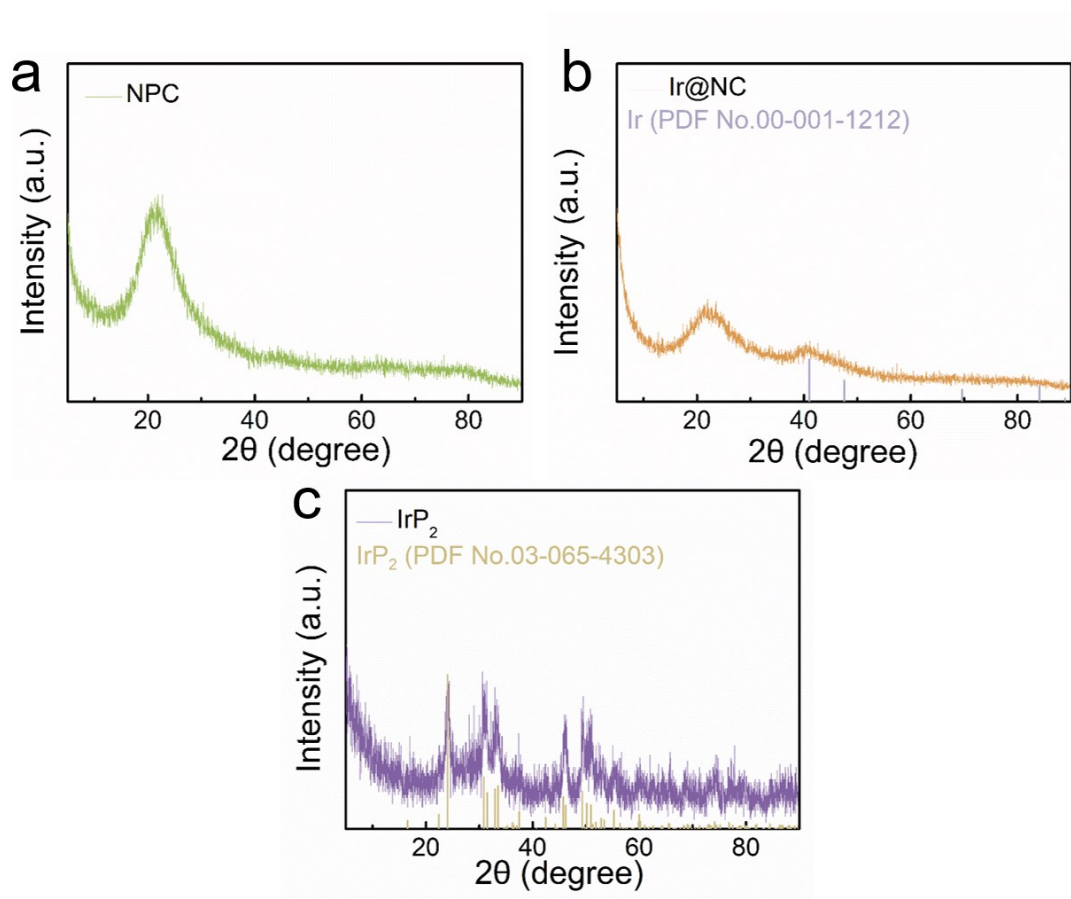

**Fig. S5** XRD patterns of (a) NPC, (b) Ir@NC, and (c) IrP<sub>2</sub> NPs.

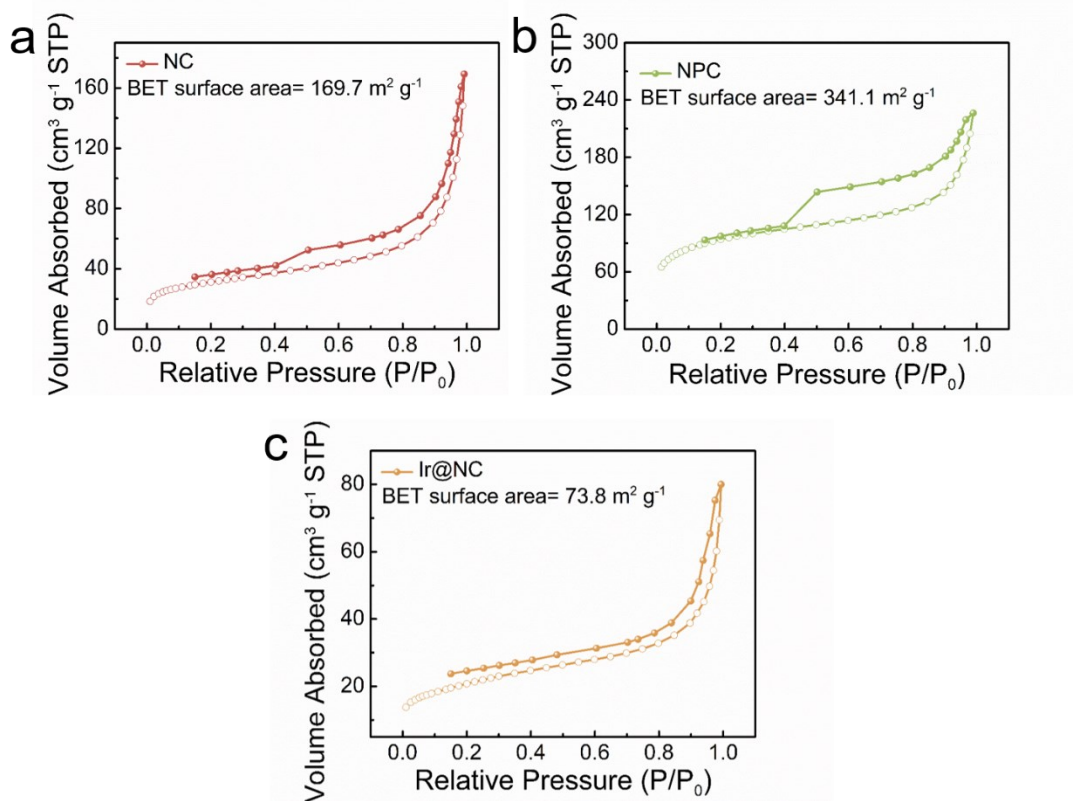

**Fig. S6** N<sub>2</sub> sorption isotherm and pore size distribution of (a) NC, (b) NPC, and (c)

Ir@NC.

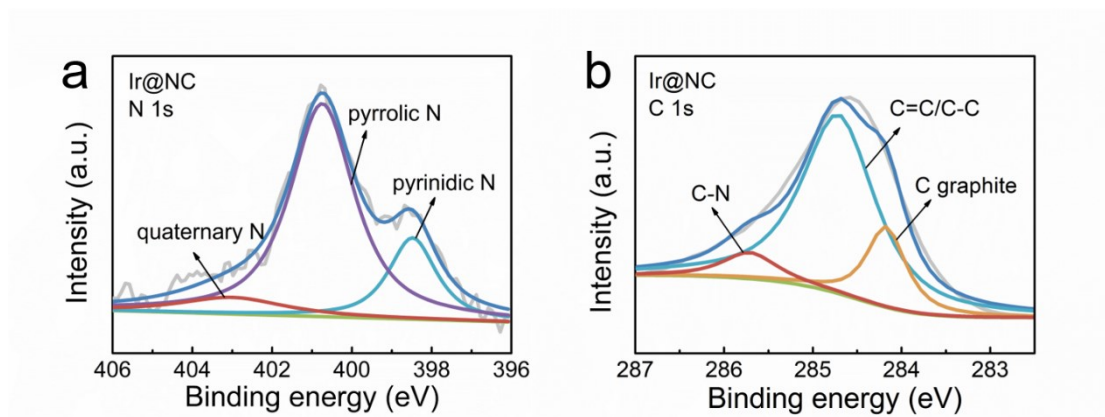

**Fig. S7** (a) N 1s and (b) C 1s XPS spectrum of Ir@NC.



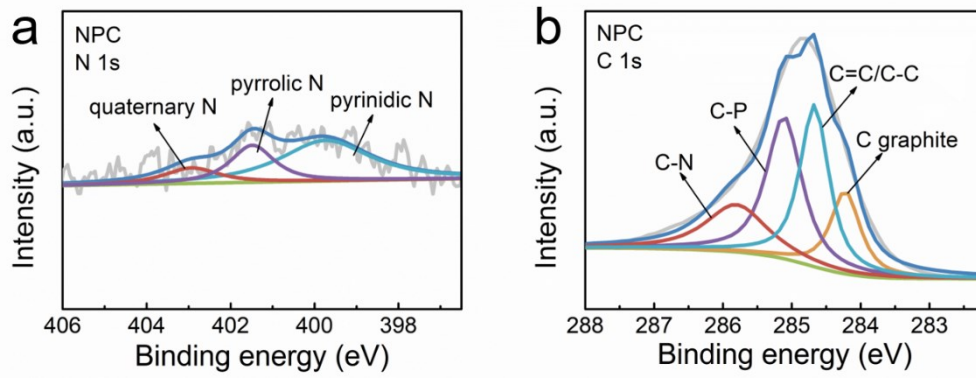

**Fig. S8** (a) N 1s and (b) C 1s XPS spectrum of NPC.

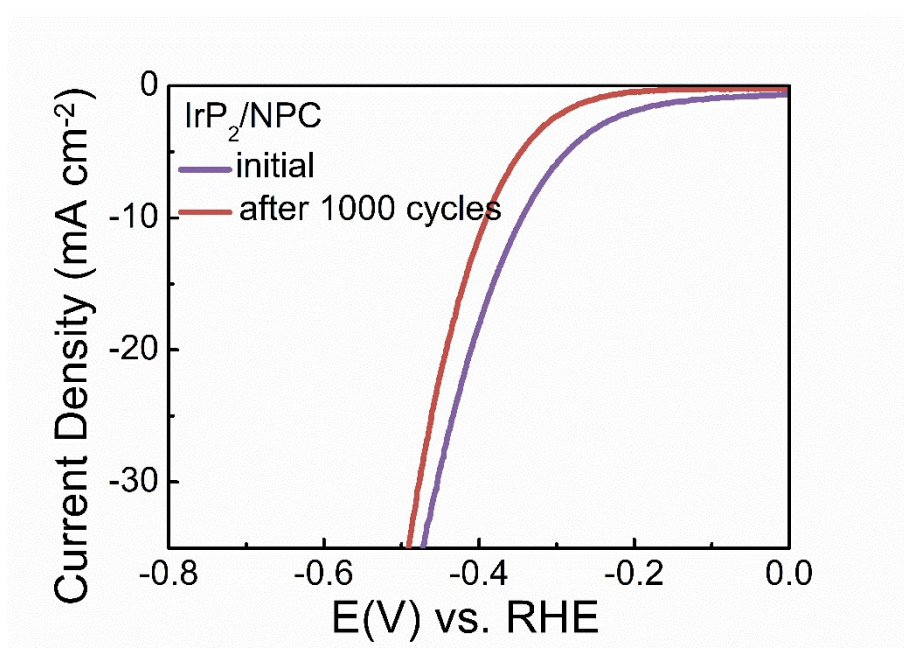

**Fig. S9** HER polarization curves of IrP<sub>2</sub>/NPC before and after 1000 CV cycles from -0.2 to 0.1 V (vs. RHE) in 0.5 M H<sub>2</sub>SO<sub>4</sub>.

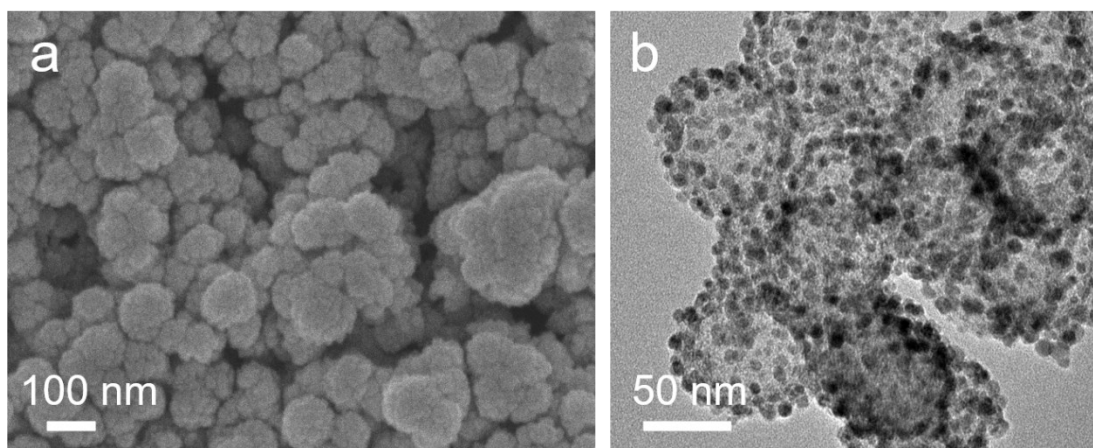

**Fig. S10** (a) SEM and (b) TEM images of IrP<sub>2</sub>@NPC after stability test in 0.5 M H<sub>2</sub>SO<sub>4</sub>.

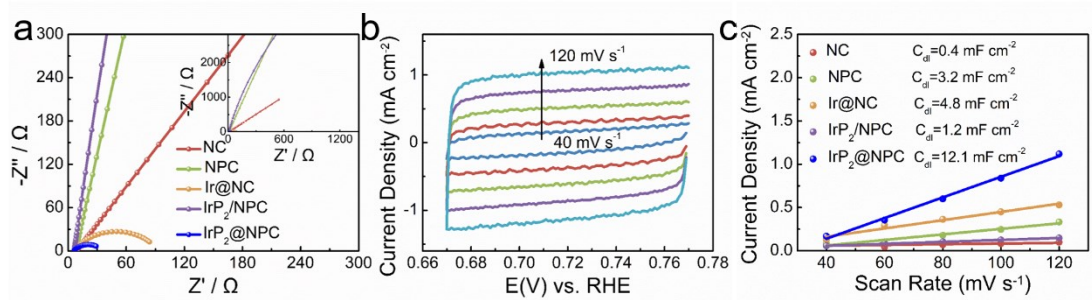

**Fig. S11** (a) Nyquist plots of NC, NPC, Ir@NC, IrP<sub>2</sub>/NPC, and IrP<sub>2</sub>@NPC nanoshells.

(b) CV scans of double-layer capacitance measurement of IrP<sub>2</sub>@NPC nanoshells at different scanning rates in 1.0 M KOH. (c) Double-layer capacitances of these

catalysts.

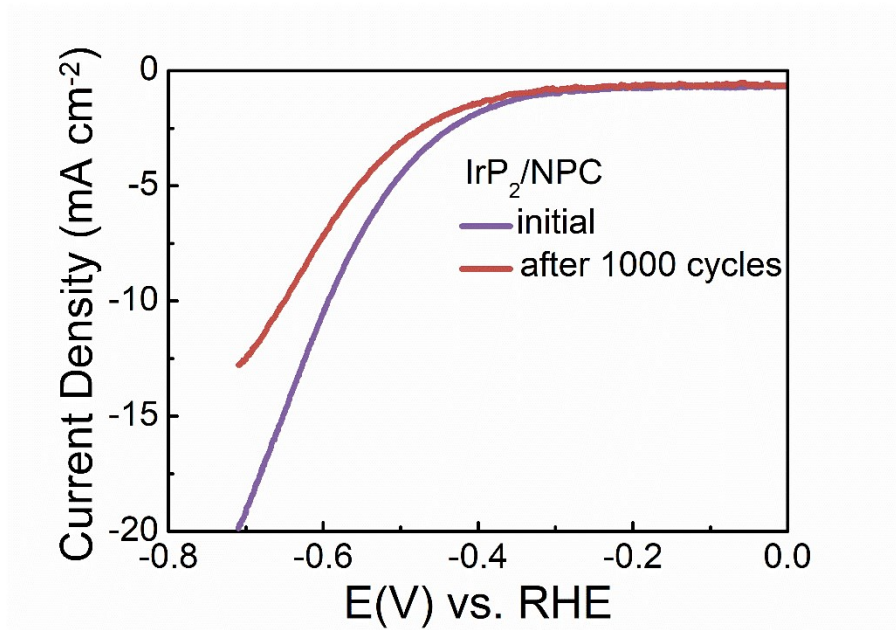

**Fig. S12** HER polarization curves of IrP<sub>2</sub>/NPC before and after 1000 CV cycles from -0.2 to 0.1 V (vs. RHE) in 1.0 M KOH.

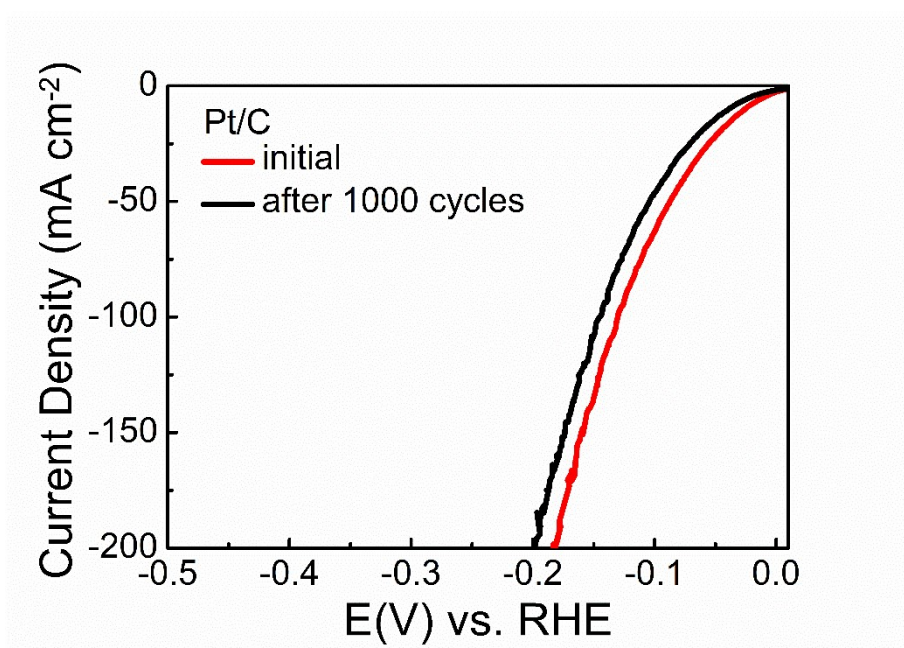

**Fig. S13** HER polarization curves of Pt/C before and after 1000 CV cycles from -0.2 to 0.1 V (vs. RHE) in 1.0 M KOH.

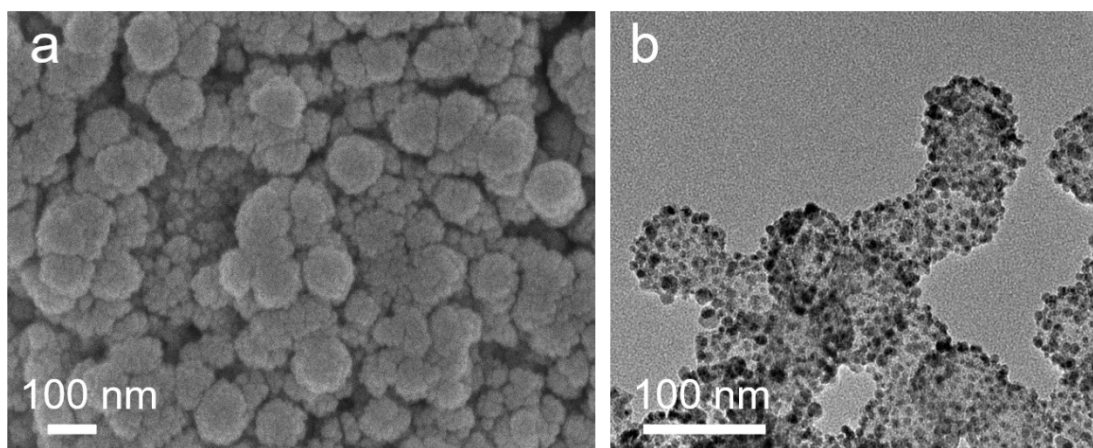

**Fig. S14** (a) SEM and (b) TEM images of IrP<sub>2</sub>@NPC after stability test in 1.0 M KOH.

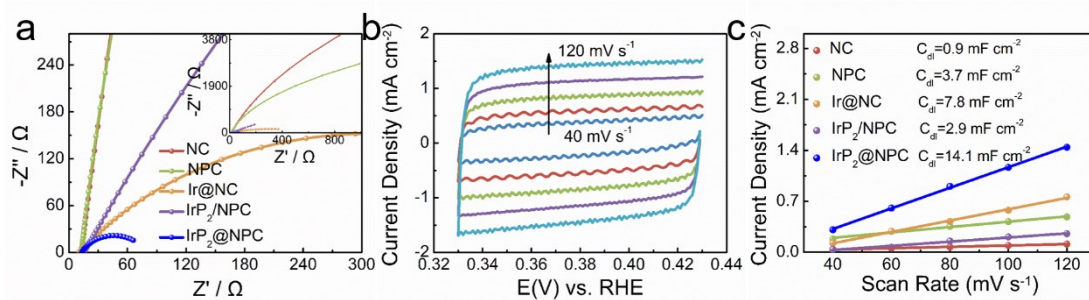

**Fig. S15** (a) Nyquist plots of NC, NPC, Ir@NC, IrP<sub>2</sub>/NPC, and IrP<sub>2</sub>@NPC nanoshells.

(b) CV scans of double-layer capacitance measurement of IrP<sub>2</sub>@NPC nanoshells at

different scanning rates in 1.0 M PBS. (c) Double-layer capacitances of these catalysts.



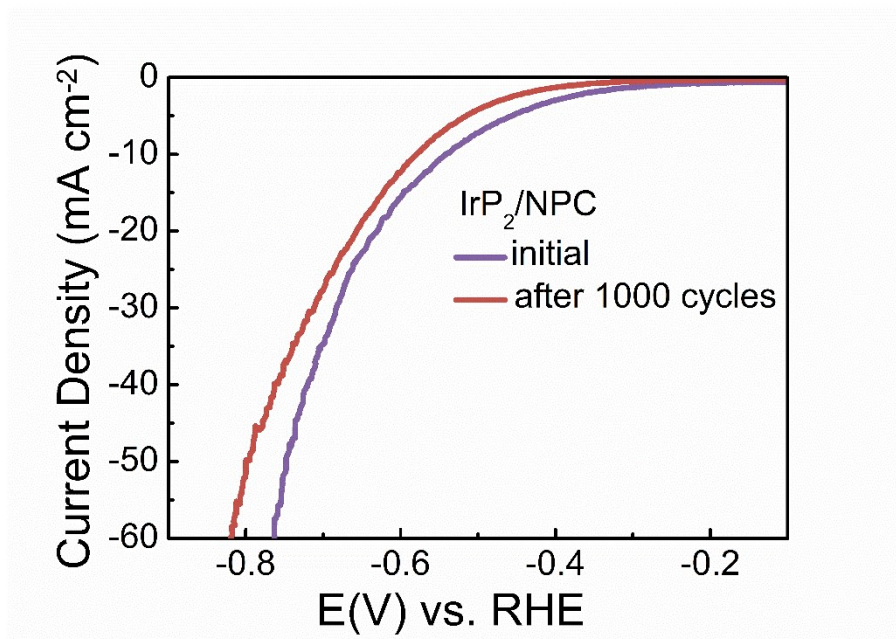

**Fig. S16** HER polarization curves of Pt/C before and after 1000 CV cycles from -0.2 to 0.1 V (vs. RHE) in 1.0 M PBS.

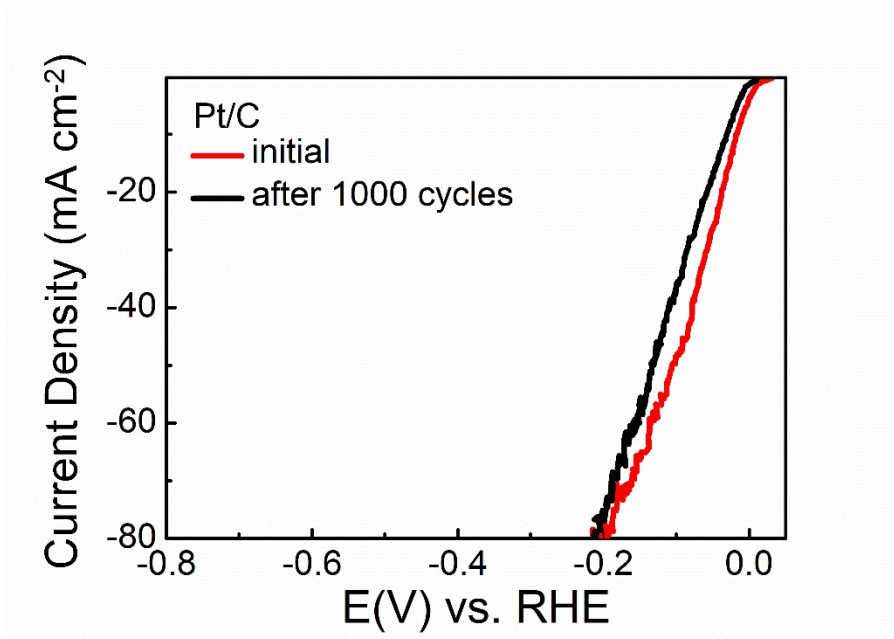

**Fig. S17** HER polarization curves of IrP<sub>2</sub>/NPC before and after 1000 CV cycles from -0.2 to 0.1 V (vs. RHE) in 1.0 M PBS.

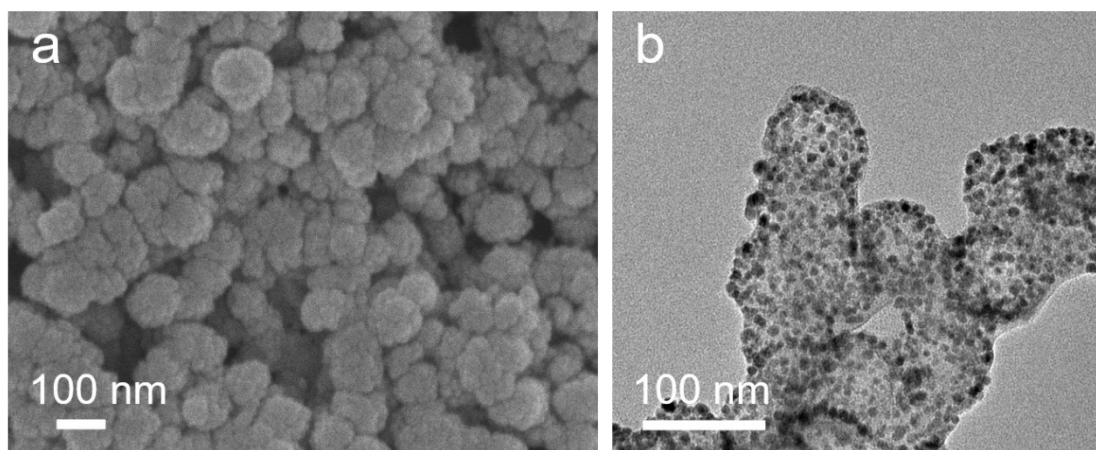

**Fig. S18** (a) SEM and (b) TEM images of IrP<sub>2</sub>@NPC after stability test in 1.0 M PBS.

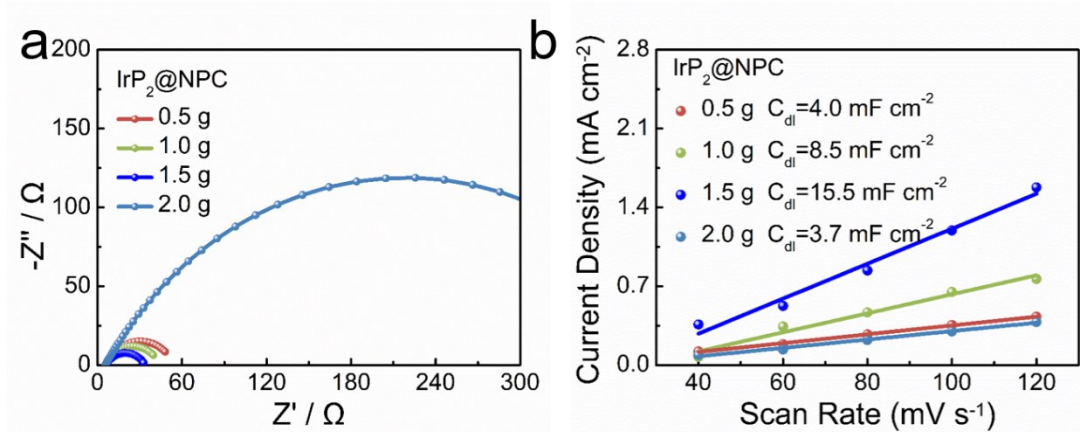

**Fig. S19** (a) Nyquist plots and (b)  $C_{dl}$  of  $\text{IrP}_2\text{@NPC}$  series samples in 0.5 M  $\text{H}_2\text{SO}_4$ .

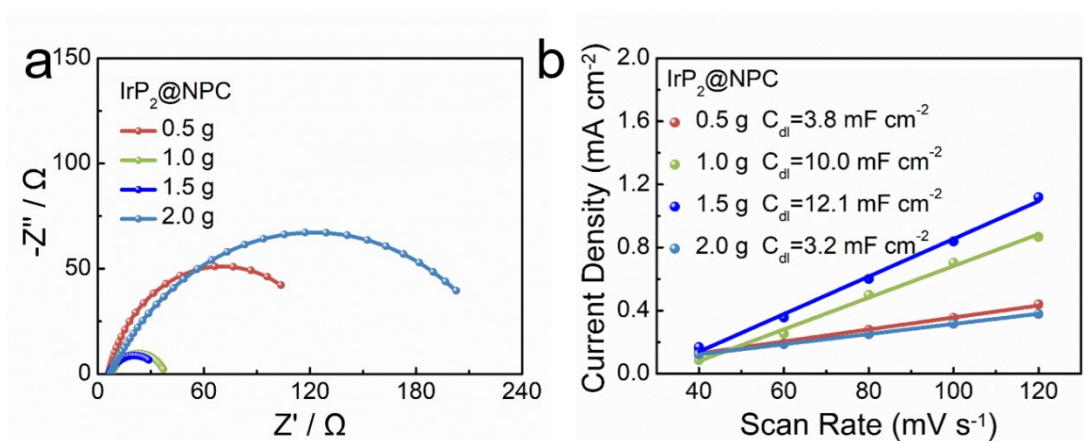

**Fig. S20** (a) Nyquist plots and (b)  $C_{dl}$  of IrP<sub>2</sub>@NPC series samples in 1.0 M KOH.

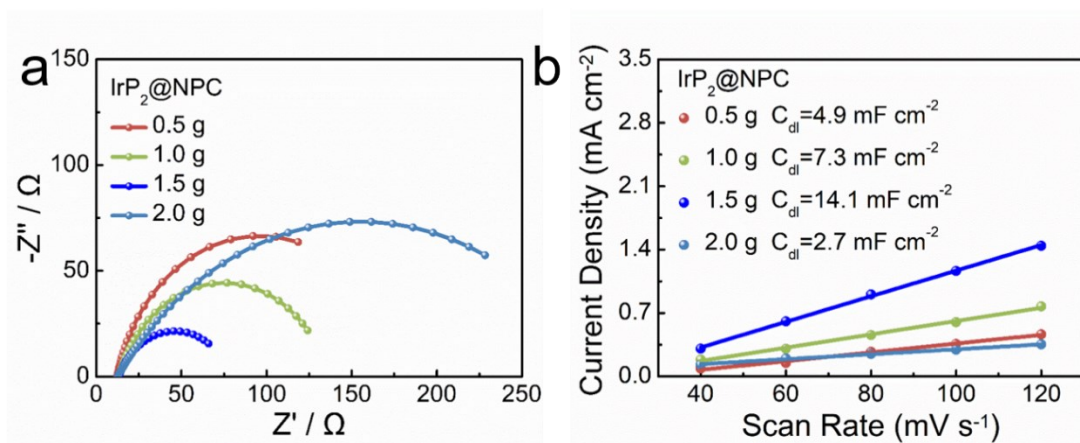

**Fig. S21** (a) Nyquist plots and (b)  $C_{dl}$  of  $\text{IrP}_2\text{@NPC}$  series samples in 1.0 M PBS.

**Table S1.** Atomic content of Ir, P, C, N, and O estimated by EDX measurements for

IrP<sub>2</sub>@NPC with varied P content.

| Samples                       | Atomic content (at. %) |       |       |      |       |
|-------------------------------|------------------------|-------|-------|------|-------|
|                               | Ir                     | P     | C     | N    | O     |
| IrP <sub>2</sub> @NPC (0.5 g) | 1.27                   | 7.05  | 71.1  | 2.89 | 17.69 |
| IrP <sub>2</sub> @NPC (1.0 g) | 1.70                   | 10.86 | 69.92 | 2.53 | 14.99 |
| IrP <sub>2</sub> @NPC (1.5 g) | 1.65                   | 13.41 | 59.67 | 2.34 | 22.93 |
| IrP <sub>2</sub> @NPC (2.0 g) | 1.12                   | 14.97 | 61.82 | 2.19 | 19.90 |

**Table S2.** Comparison of HER activity between IrP<sub>2</sub>@NPC and recently reported transition metal phosphides electrocatalysts in a wide pH range.

| Electrocatalysts      | <i>j</i><br>(mA cm <sup>-2</sup> ) | <i>η</i><br>(mV) | <i>b</i><br>(mV dec <sup>-1</sup> ) | Electrolyte<br>solution              | Refs.     |
|-----------------------|------------------------------------|------------------|-------------------------------------|--------------------------------------|-----------|
|                       | 10                                 | 32               | 37                                  | 0.5 M H <sub>2</sub> SO <sub>4</sub> |           |
| IrP <sub>2</sub> @NPC | 10                                 | 42               | 56                                  | 1.0 M KOH                            | This work |
|                       | 10                                 | 90               | 87                                  | 1.0 M PBS                            |           |
|                       | 10                                 | 38               | 38                                  | 0.5 M H <sub>2</sub> SO <sub>4</sub> |           |
| RuP <sub>2</sub> @NPC | 10                                 | 52               | 69                                  | 1.0 M KOH                            | 1         |
|                       | 10                                 | 57               | 87                                  | 1.0 M PBS                            |           |
|                       | 10                                 | 51               | 46                                  | 0.5 M H <sub>2</sub> SO <sub>4</sub> |           |
| RuP <sub>x</sub> @NPC | 10                                 | 74               | 70                                  | 1.0 M KOH                            | 2         |
|                       | 10                                 | 110              | 59                                  | 1.0 M PBS                            |           |
|                       | 10                                 | 19               | 37                                  | 0.5 M H <sub>2</sub> SO <sub>4</sub> |           |
| RuP(L-RP)             | 10                                 | 18               | 34                                  | 1.0 M KOH                            | 3         |
|                       | 10                                 | 95               | 54                                  | 1.0 M PBS                            |           |
| IrP <sub>2</sub> @NC  | 10                                 | 8                | 28                                  | 0.5 M H <sub>2</sub> SO <sub>4</sub> | 4         |
|                       | 10                                 | 28               | 50                                  | 1.0 M KOH                            |           |
|                       | 10                                 | 130              | 69                                  | 0.5 M H <sub>2</sub> SO <sub>4</sub> |           |
| WP NAs/CC             | 10                                 | 150              | 102                                 | 1.0 M KOH                            | 5         |
|                       | 10                                 | 200              | 125                                 | 1.0 M PBS                            |           |
| WP <sub>2</sub> NPs/W | 10                                 | 143              | 66                                  | 0.5 M H <sub>2</sub> SO <sub>4</sub> | 6         |



|                        |    |     |      |                                      |    |
|------------------------|----|-----|------|--------------------------------------|----|
|                        | 10 | 214 | 92   | 1.0 M KOH                            |    |
|                        | 10 | 201 | 95   | 1.0 M PBS                            |    |
|                        | 10 | 58  | 63.6 | 0.5 M H <sub>2</sub> SO <sub>4</sub> |    |
| MoP <sub>2</sub> NS/CC | 10 | 67  | 70   | 1.0 M KOH                            | 7  |
|                        | 10 | 85  | 98.3 | 1.0 M PBS                            |    |
|                        | 10 | 124 | 58   | 0.5 M H <sub>2</sub> SO <sub>4</sub> |    |
| MoP NA/CC              | 10 | 80  | 83   | 1.0 M KOH                            | 8  |
|                        | 10 | 187 | 94   | 1.0 M PBS                            |    |
|                        | 10 | 115 | 65   | 0.5 M H <sub>2</sub> SO <sub>4</sub> |    |
| MoP NPs@NC             | 10 | 80  | 59   | 1.0 M KOH                            | 9  |
|                        | 10 | 136 | 71   | 1.0 M PBS                            |    |
|                        | 10 | 67  | 51   | 0.5 M H <sub>2</sub> SO <sub>4</sub> |    |
| CoP/CC                 | 10 | 209 | 129  | 1.0 M KOH                            | 10 |
|                        | 2  | 65  | 93   | 1.0 M PBS                            |    |
|                        | 20 | 95  | 65   | 0.5 M H <sub>2</sub> SO <sub>4</sub> |    |
| np-CoP NWs/Ti          | 20 | 150 | 71   | 1.0 M KOH                            | 11 |
|                        | 10 | 178 | 125  | 1.0 M PBS                            |    |
|                        | 10 | 87  | 46   | 0.5 M H <sub>2</sub> SO <sub>4</sub> |    |
| CoP@BCN                | 10 | 215 | 52   | 1.0 M KOH                            | 12 |
|                        | 10 | 122 | 59   | 1.0 M PBS                            |    |

---

**Table S3** Elemental values of fitted equivalent circuit resistances of NC, NPC, Ir@NC, IrP<sub>2</sub>/NPC, and IrP<sub>2</sub>@NPC in 0.5 M H<sub>2</sub>SO<sub>4</sub>, 1.0 M KOH, and 1.0 M PBS.

| Samples               | 0.5 M H <sub>2</sub> SO <sub>4</sub> |                    | 1.0 M KOH         |                    | 1.0 M PBS         |                    |
|-----------------------|--------------------------------------|--------------------|-------------------|--------------------|-------------------|--------------------|
|                       | R <sub>s</sub> /Ω                    | R <sub>ct</sub> /Ω | R <sub>s</sub> /Ω | R <sub>ct</sub> /Ω | R <sub>s</sub> /Ω | R <sub>ct</sub> /Ω |
| NC                    | 6.05                                 | 195380             | 8.5               | 942570             | 12.67             | 39147              |
| NPC                   | 7.4                                  | 27519              | 7.794             | 605480             | 12.75             | 12238              |
| Ir@NC                 | 5.48                                 | 34.16              | 6.6               | 86.34              | 10.46             | 600.7              |
| IrP <sub>2</sub> /NPC | 6.92                                 | 13872              | 6.238             | 37529              | 15.47             | 5528               |
| IrP <sub>2</sub> @NPC | 5.79                                 | 30                 | 6.19              | 28.5               | 13.15             | 56.5               |

**Table S4** Elemental values of fitted equivalent circuit resistances of IrP<sub>2</sub>@NPC with various P amount in 0.5 M H<sub>2</sub>SO<sub>4</sub>, 1.0 M KOH, and 1.0 M PBS.

| Samples                       | 0.5 M H <sub>2</sub> SO <sub>4</sub> |                    | 1.0 M KOH         |                    | 1.0 M PBS         |                    |
|-------------------------------|--------------------------------------|--------------------|-------------------|--------------------|-------------------|--------------------|
|                               | R <sub>s</sub> /Ω                    | R <sub>ct</sub> /Ω | R <sub>s</sub> /Ω | R <sub>ct</sub> /Ω | R <sub>s</sub> /Ω | R <sub>ct</sub> /Ω |
| IrP <sub>2</sub> @NPC (0.5 g) | 6.5                                  | 42.93              | 6.4               | 129.4              | 12.27             | 167.8              |
| IrP <sub>2</sub> @NPC (1.0 g) | 5.8                                  | 38.71              | 7.63              | 30.69              | 13.33             | 123.3              |
| IrP <sub>2</sub> @NPC (1.5 g) | 5.79                                 | 30                 | 6.19              | 28.5               | 13.15             | 56.5               |
| IrP <sub>2</sub> @NPC (2.0 g) | 5.46                                 | 426.7              | 6.9               | 229.8              | 12.35             | 285.8              |

## References

- 1 Z. Pu, I. S. Amiin, Z. Kou, W. Li and S. Mu, *Angew. Chem. Int. Ed.*, 2017, **56**, 11559-11564.
- 2 J. Chi, W. Gao, J. Lin, B. Dong, K. Yan, J. Qin, B. Liu, Y. Chai and C. Liu, *ChemSusChem*, 2018, **11**, 743-752.
- 3 J. Yu, Y. Guo, S. She, S. Miao, M. Ni, W. Zhou, M. Liu and Z. Shao, *Adv. Mater.*, 2018, **30**, 1800047.
- 4 Z. Pu, J. Zhao, I. S. Amiin, W. Li, M. Wang, D. He and S. Mu, *Energy Environ. Sci.*, 2019, **12**, 952-957.
- 5 Z. Pu, Q. Liu, A. M. Asiri and X. Sun, *ACS Appl. Mater. Interfaces*, 2014, **6**, 21874-21879.
- 6 Z. Pu, I. S. Amiin and S. Mu, *Energy Technol.*, 2016, **4**, 1030-1034.
- 7 W. Zhu, C. Tang, D. Liu, J. Wang, A. M. Asiri and X. Sun, *J. Mater. Chem. A*, 2016, **4**, 7169-7173.
- 8 Z. Pu, S. Wei, Z. Chen and S. Mu, *Appl. Catal. B: Environ.* 2016, **196**, 193-198.
- 9 Z. Pu, I. S. Amiin, X. Liu, M. Wang and S. Mu, *Nanoscale*, 2016, **8**, 17256-17261.
- 10 J. Tian, Q. Liu, A. M. Asiri and X. Sun, *J. Am. Chem. Soc.*, 2014, **136**, 7587-7590.
- 11 S. Gu, H. Du, A. M. Asiri, X. Sun and C. M. Li, *Phys. Chem. Chem. Phys.*, 2014, **16**, 16909-16913.
- 12 H. Tabassum, W. Guo, W. Meng, A. Mahmood, R. Zhao, Q. Wang and R. Zou, *Adv. Energy Mater.*, 2017, **7**, 1601671.
